# Supplementary material for: Antioxidant activity, anti-tyrosinase activity, molecular docking studies, and molecular dynamic simulation of active compounds found in nipa palm vinegar
Source: PeerJ. 2023 Nov 24;11:e16494. doi: 10.7717/peerj.16494 (PMC10680452; doi:10.7717/peerj.16494)
Supplement: Supplemental Information 5 [file peerj-11-16494-s005.xlsx]

## Sheet: Sheet1
	Figure 1a	Total phenolic content (mg GAE/g dry extract or powder)
	NPV Conc.	AE O-NPV					NPV-P					AE NPV-P
	mg/mL	1	2	3	Mean	SD	1	2	3	Mean	SD	1	2	3	Mean	SD
	1	2.41	2.53	2.13	2.35667	0.205264	0.71	0.79	0.82	0.773333	0.0568624	0.25	0.23	0.25	0.243333	0.011547
	Figure 1b	Total flavonoid content (mg GAE/g dry extract or powder)
	NPV Conc.	AE O-NPV					NPV-P					AE NPV-P
	mg/mL	1	2	3	Mean	SD	1	2	3	Mean	SD	1	2	3	Mean	SD
	1	5.11	5.05	5.16	5.10667	0.0550757	4.78	4.67	4.57	4.67333	0.10504	4.73	4.78	4.21	4.57333	0.315647
	Figure 2a	DPPH radical scavenging activity (% of control)
	NPV Conc.	AE O-NPV					NPV-P					AE NPV-P
	mg/mL	1	2	3	Mean	SD	1	2	3	Mean	SD	1	2	3	Mean	SD
	4	-9.82503	-9.82503	-9.6687	-9.77292	0.0902621	4.03769	3.89262	3.89262	3.94097	0.0837548	1.74497	1.47651	1.52672	1.58273	0.142725
	Figure 2a
	Ascorbic acid conc.	DPPH radical scavenging activity (% of control)
	μg/mL	1	2	3	Mean	SD
	50	87.1094	88.7207	89.7461	88.5254	1.32917
	Figure 2b	ABTS radical cation scavenging activity (% of control)
	NPV Conc.	AE O-NPV
	mg/mL	1	2	3	Mean	SD
	40	56.01	57.36	63.59	58.9867	4.04334
	20	50.58	47.45	50.68	49.57	1.83665
	10	34.76	38.06	35.67	36.1633	1.70442
	5	21.09	21.25	21.34	21.2267	0.126623
	Figure 3	Tyrosinase inhibition (%)
	NPV Conc.	AE O-NPV (Figure 3a)					NPV-P (Figure 3b)					AE NPV-P (Figure 3c)
	mg/mL	1	2	3	Mean	SD	1	2	3	Mean	SD	1	2	3	Mean	SD
	5	75.7	78.94	78.62	77.7533	1.78542	13.1	13.72	13.23	13.35	0.326956	14.74	16.26	15.64	15.5467	0.764286
	10	98.5	93.41	96.62	96.1767	2.5738	57.29	60.07	62.85	60.07	2.78	47.22	43.13	41.33	43.8933	3.01828
	20	97.92	101.39	100.69	100	2.39051	91.42	93.67	90.96	92.0167	1.45018	91.32	88.36	94.63	91.4367	3.13663
	40	101.3	101.64	97.34	100.093	1.83502	97.29	99.31	97.74	98.1133	1.06049	94.35	97.12	99.31	96.9267	2.48565
	Figure 3d
	Ascorbic acid conc.	Tyrosinase inhibition (%)
	μg/mL	1	2	3	Mean	SD
	6.25	8.96	10.58	7.34	8.96	1.62
	12.5	24.19	24.84	24.42	24.4833	0.329596
	25	50.11	53.02	52.7	51.9433	1.59575
	50	73.92	72.45	71.6	72.6567	1.17373
